# Supplementary material
Source: HighWire-hosted journal article supplement (https://www.cmajopen.ca/highwire/filestream/89525/field_highwire_adjunct_files/4/open-2022-0098-5-at.pdf)
Supplement: open-2022-0098-5-at.pdf [file open-2022-0098-5-at.pdf]

## Appendix 5. Draft guideline table of contents

The report will include the following sections:

1. Introduction
2. Who are these recommendations for?
3. Methods of the Evidence Review
4. Formulating the recommendations: a description on the process of how the recommendations were formulated
5. Included guidelines
6. Limitations of the evidence review
7. Recommendations
8. References
9. Appendix 1: Search strategy(ies)
10. Appendix 2: Evidence tables (modified as appropriate to adhere to copyright)
11. Appendix 3: Summary of recommendations: including the strength of the recommendation and the dose of ionized radiation associated with that imaging modality
12. Appendix 4: List of potentially relevant guidelines published in non-English
13. Appendix 5: Modified AGREE-II assessments
